# Supplementary material for: Recognizing and stabilizing miR-21 by chiral ruthenium(II) complexes
Source: BMC Chem. 2020 Apr 3;14(1):26. doi: 10.1186/s13065-020-00672-8 (PMC7119291; doi:10.1186/s13065-020-00672-8)
Supplement: Supplementary file 2 — Additional file 2. Raw data for RT-qPCR analysis. [file 13065_2020_672_MOESM2_ESM.csv]

SDS 2.3	AQ Results	1
Filename	20130924
PlateID
Assay Type	Absolute Quantification
Run DateTime	2013/9/24 21:55
Operator
ThermalCycleParams
Sample Information
Well	Sample Name	Detector Name	Reporter	Task	Ct	Quantity	Qty Mean	Qty StdDev	Ct Median	Ct Mean	Ct StdDev	Baseline Type	Baseline Start	Baseline Stop	Threshold Type	Threshold	FOS	HMD	LME	EW	BPR	NAW	HNS	HRN	EAF	BAF	TAF	CAF
52	L0	mir21	SYBR	Unknown	22.945192				22.945192	22.932922	0.021536954	Automatic			Automatic	0.7311123
53	L0	mir21	SYBR	Unknown	22.94552				22.945192	22.932922	0.021536954	Automatic			Automatic	0.7311123
54	L0	mir21	SYBR	Unknown	22.908054				22.945192	22.932922	0.021536954	Automatic			Automatic	0.7311123
76	L25	mir21	SYBR	Unknown	24.124014				24.08575	24.093374	0.027629072	Automatic			Automatic	0.7311123				TRUE
77	L25	mir21	SYBR	Unknown	24.070356				24.08575	24.093374	0.027629072	Automatic			Automatic	0.7311123				TRUE
78	L25	mir21	SYBR	Unknown	24.08575				24.08575	24.093374	0.027629072	Automatic			Automatic	0.7311123				TRUE
64	L5	mir21	SYBR	Unknown	22.838816				22.973936	22.94628	0.09665109	Automatic			Automatic	0.7311123
65	L5	mir21	SYBR	Unknown	22.973936				22.973936	22.94628	0.09665109	Automatic			Automatic	0.7311123
66	L5	mir21	SYBR	Unknown	23.026089				22.973936	22.94628	0.09665109	Automatic			Automatic	0.7311123
88	L50	mir21	SYBR	Unknown	23.325634				23.325634	23.30931	0.1459529	Automatic			Automatic	0.7311123
89	L50	mir21	SYBR	Unknown	23.15588				23.325634	23.30931	0.1459529	Automatic			Automatic	0.7311123				TRUE
90	L50	mir21	SYBR	Unknown	23.446413				23.325634	23.30931	0.1459529	Automatic			Automatic	0.7311123
4	d0	mir21	SYBR	Unknown	22.669104				22.48764	22.497225	0.16729172	Automatic			Automatic	0.7311123				TRUE			TRUE
5	d0	mir21	SYBR	Unknown	22.334932				22.48764	22.497225	0.16729172	Automatic			Automatic	0.7311123				TRUE
6	d0	mir21	SYBR	Unknown	22.48764				22.48764	22.497225	0.16729172	Automatic			Automatic	0.7311123				TRUE
28	d25	mir21	SYBR	Unknown	22.978037				22.93042	22.929184	0.04948151	Automatic			Automatic	0.7311123				TRUE
29	d25	mir21	SYBR	Unknown	22.879097				22.93042	22.929184	0.04948151	Automatic			Automatic	0.7311123				TRUE
30	d25	mir21	SYBR	Unknown	22.93042				22.93042	22.929184	0.04948151	Automatic			Automatic	0.7311123				TRUE
16	d5	mir21	SYBR	Unknown	22.855795				22.855795	22.876814	0.10771022	Automatic			Automatic	0.7311123				TRUE
17	d5	mir21	SYBR	Unknown	22.78116				22.855795	22.876814	0.10771022	Automatic			Automatic	0.7311123				TRUE
18	d5	mir21	SYBR	Unknown	22.993483				22.855795	22.876814	0.10771022	Automatic			Automatic	0.7311123				TRUE
40	d50	mir21	SYBR	Unknown	22.636013				22.636013	22.578468	0.15632127	Automatic			Automatic	0.7311123
41	d50	mir21	SYBR	Unknown	22.401531				22.636013	22.578468	0.15632127	Automatic			Automatic	0.7311123
42	d50	mir21	SYBR	Unknown	22.69786				22.636013	22.578468	0.15632127	Automatic			Automatic	0.7311123
Slope		cycles/log decade
Y-Intercept
R^2
Well	Sample Name	Detector Name	Reporter	Task	Ct	Quantity	Qty Mean	Qty StdDev	Ct Median	Ct Mean	Ct StdDev	Baseline Type	Baseline Start	Baseline Stop	Threshold Type	Threshold	FOS	HMD	LME	EW	BPR	NAW	HNS	HRN	EAF	BAF	TAF	CAF
49	L0	u6	SYBR	Unknown	14.856215				15.1320715	15.055102	0.17370167	Automatic			Automatic	0.5676455
50	L0	u6	SYBR	Unknown	15.1320715				15.1320715	15.055102	0.17370167	Automatic			Automatic	0.5676455
51	L0	u6	SYBR	Unknown	15.17702				15.1320715	15.055102	0.17370167	Automatic			Automatic	0.5676455
73	L25	u6	SYBR	Unknown	15.963679				15.984935	16.014717	0.070794515	Automatic			Automatic	0.5676455							TRUE
74	L25	u6	SYBR	Unknown	15.984935				15.984935	16.014717	0.070794515	Automatic			Automatic	0.5676455				TRUE
75	L25	u6	SYBR	Unknown	16.095537				15.984935	16.014717	0.070794515	Automatic			Automatic	0.5676455				TRUE
61	L5	u6	SYBR	Unknown	15.226182				15.226182	15.247508	0.30382073	Automatic			Automatic	0.5676455
62	L5	u6	SYBR	Unknown	14.954911				15.226182	15.247508	0.30382073	Automatic			Automatic	0.5676455
63	L5	u6	SYBR	Unknown	15.561429				15.226182	15.247508	0.30382073	Automatic			Automatic	0.5676455
85	L50	u6	SYBR	Unknown	15.441394				15.424158	15.363976	0.11947818	Automatic			Automatic	0.5676455				TRUE
86	L50	u6	SYBR	Unknown	15.226373				15.424158	15.363976	0.11947818	Automatic			Automatic	0.5676455				TRUE
87	L50	u6	SYBR	Unknown	15.424158				15.424158	15.363976	0.11947818	Automatic			Automatic	0.5676455				TRUE
1	d0	u6	SYBR	Unknown	15.196143				14.868875	14.901629	0.27957994	Automatic			Automatic	0.5676455				TRUE			TRUE
2	d0	u6	SYBR	Unknown	14.639869				14.868875	14.901629	0.27957994	Automatic			Automatic	0.5676455				TRUE			TRUE
3	d0	u6	SYBR	Unknown	14.868875				14.868875	14.901629	0.27957994	Automatic			Automatic	0.5676455				TRUE			TRUE
25	d25	u6	SYBR	Unknown	14.862865				14.862865	14.800865	0.111978956	Automatic			Automatic	0.5676455				TRUE			TRUE
26	d25	u6	SYBR	Unknown	14.671598				14.862865	14.800865	0.111978956	Automatic			Automatic	0.5676455				TRUE
27	d25	u6	SYBR	Unknown	14.868131				14.862865	14.800865	0.111978956	Automatic			Automatic	0.5676455				TRUE
13	d5	u6	SYBR	Unknown	14.922864				15.095199	15.105217	0.18756248	Automatic			Automatic	0.5676455				TRUE			TRUE
14	d5	u6	SYBR	Unknown	15.095199				15.095199	15.105217	0.18756248	Automatic			Automatic	0.5676455				TRUE			TRUE
15	d5	u6	SYBR	Unknown	15.297587				15.095199	15.105217	0.18756248	Automatic			Automatic	0.5676455				TRUE
37	d50	u6	SYBR	Unknown	14.649181				14.54653	14.534961	0.12042215	Automatic			Automatic	0.5676455
38	d50	u6	SYBR	Unknown	14.409172				14.54653	14.534961	0.12042215	Automatic			Automatic	0.5676455
39	d50	u6	SYBR	Unknown	14.54653				14.54653	14.534961	0.12042215	Automatic			Automatic	0.5676455
Slope		cycles/log decade
Y-Intercept
R^2
	u6	mir21
L0	15.1320715	22.945192	7.8131205	0	1
L5	15.226182	22.973936	7.747754	-0.353061	1.277267763
L25	15.984935	24.08575	8.100815	0.2876945	0.819210153
L50	15.424158	23.325634	7.901476	0.153722	0.898928329
d0	14.868875	22.48764	7.618765	0	1
d5	15.095199	22.855795	7.760596	-0.306959	1.237097321
d25	14.862865	22.93042	8.067555	0.44879	0.732657076
d50	14.54653	22.636013	8.089483	0.328887	0.796150455
